# Supplementary material for: Comparative Bioinformatics Analysis of Transcription Factor Genes Indicates Conservation of Key Regulatory Domains among Babesia bovis, Babesia microti, and Theileria equi
Source: PubMed Central journal article supplement (PMC5104403; doi:10.1371/journal.pntd.0004983), 2016-11-10

>BBOV\_I1005270

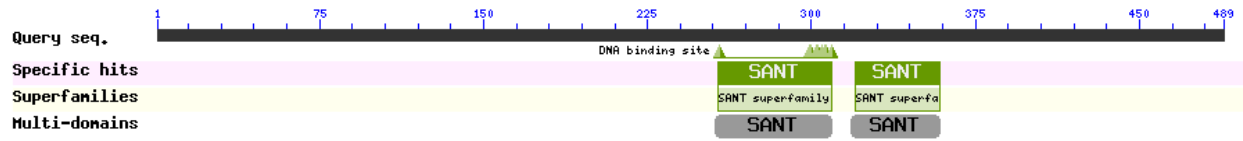

>BEWA\_000330

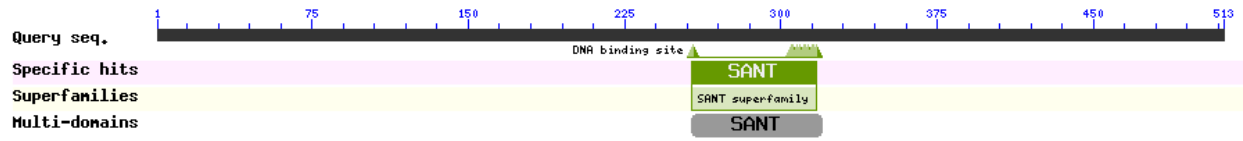

>BBM\_I03190

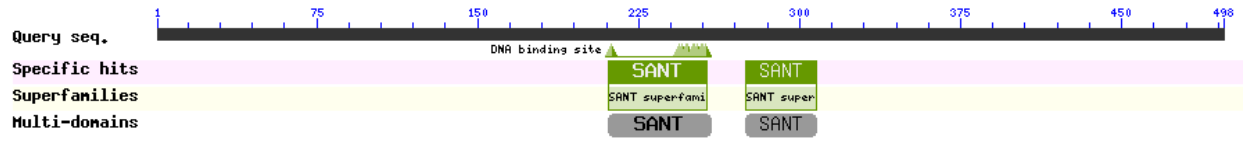

>BBOV\_I1001770

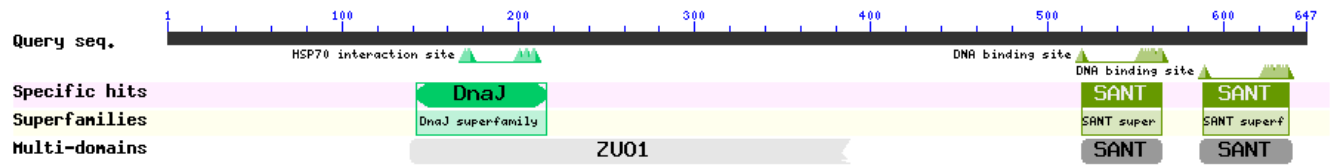

>BEWA\_009170

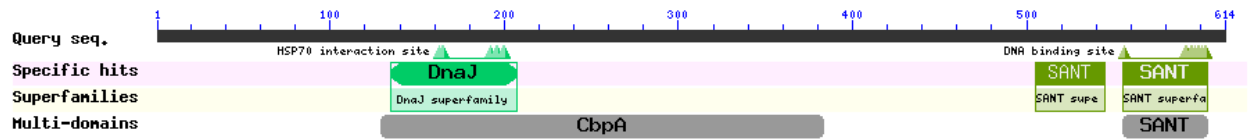

>BBM\_I02995

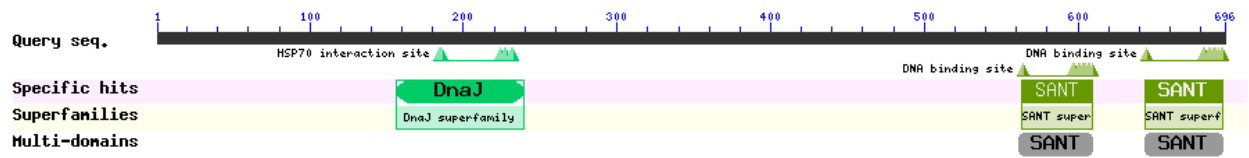

>BBOV\_I1000750

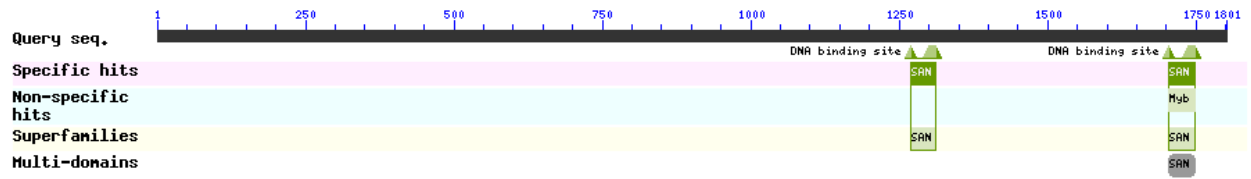

>BEWA\_008190

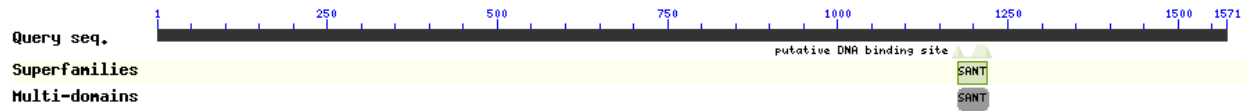

>BBM\_I103695

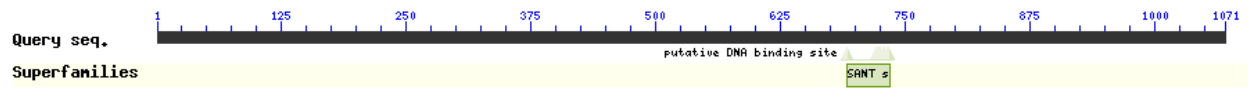

>BBOV\_III005430

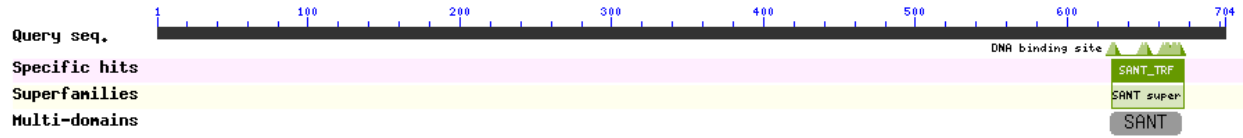

>BEWA\_021480

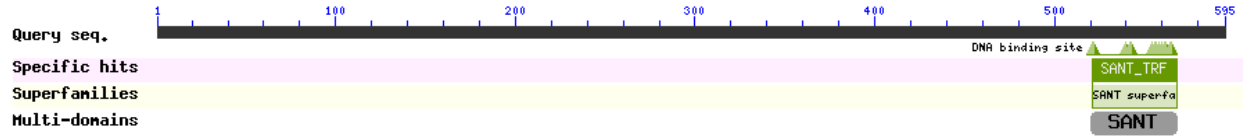

>BBM\_III07875

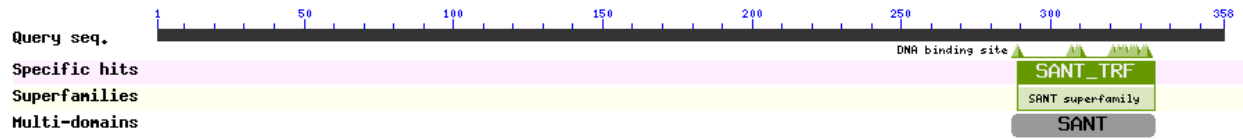

>BBOV\_IV003030

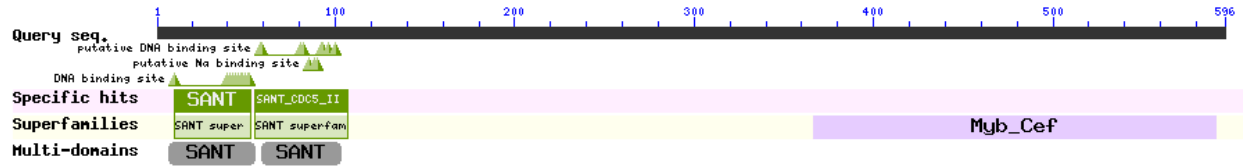

>BEWA\_044120

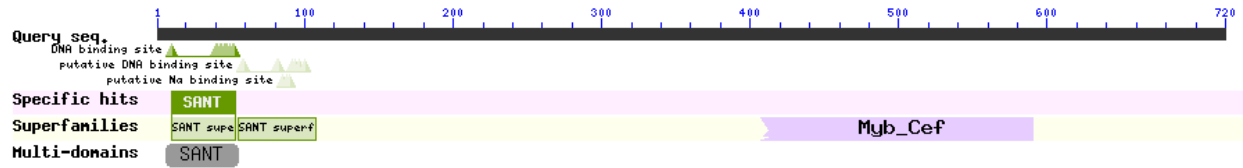

>BBM\_III01265

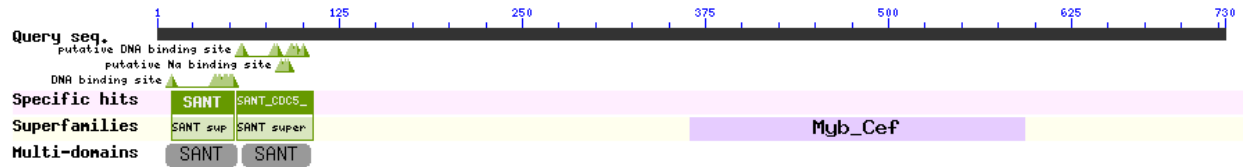

>BBOV\_IV003940

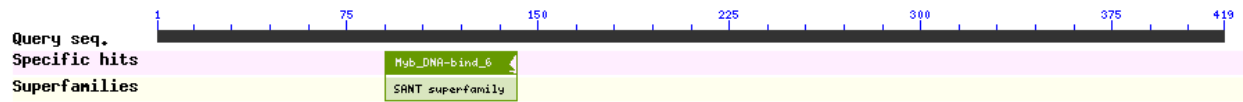

>BEWA\_042460

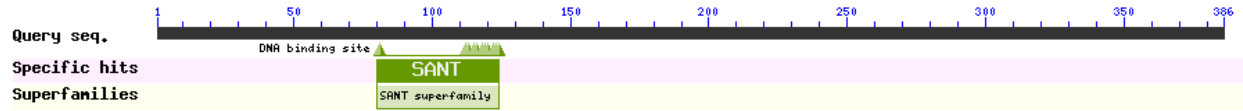

>BBM\_III04940

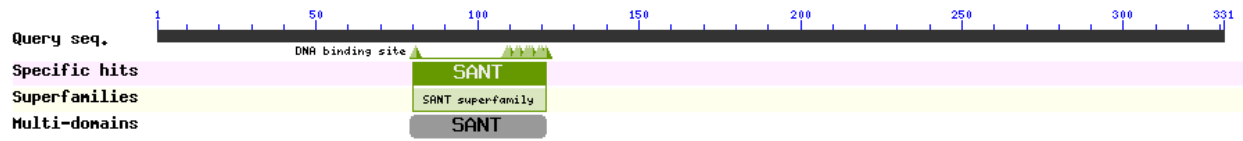

>BBOV\_IV008460

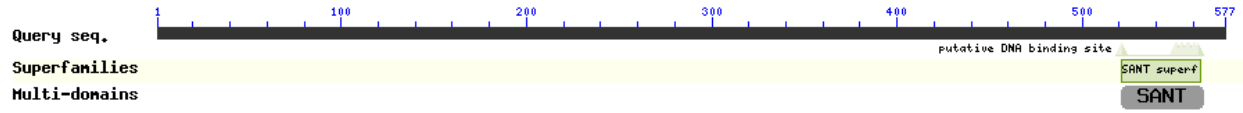

>BEWA\_041110

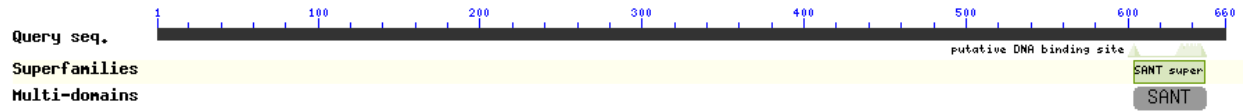

>BBM\_III04620

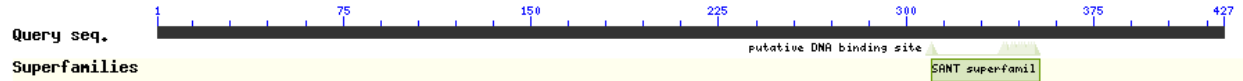

>BBOV\_IV011350

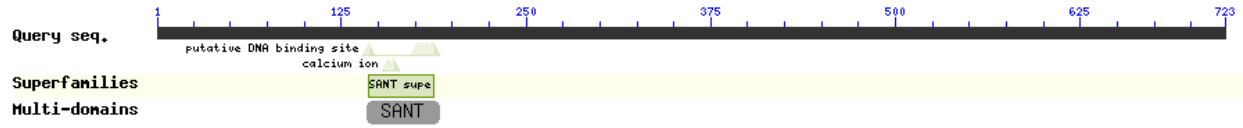

>BEWA\_042950

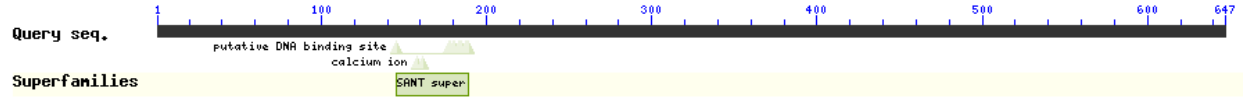

>BBM\_III09225

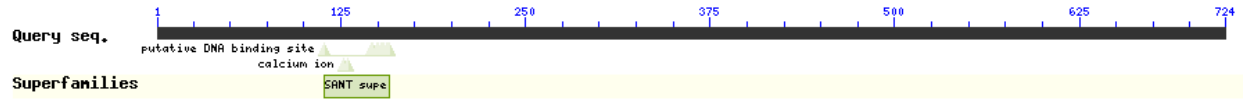

Supplement: pntd.0004983.s003.pdf [file pntd.0004983.s003.pdf]
